# Supplementary material
Source: Royal Society of Chemistry journal article supplement (doi:10.1039/d6fo00928j)
Supplement: d6fo00928j1.pdf [file d6fo00928j1.pdf]

### Supplementary information

**DHA-enriched egg yolk lipids alleviate cognitive impairment in 5×FAD mice by  
restoring neuronal and synaptic damage and regulating gut microbiota**

**Le Cheng, Yifei Wang, Yumeng Ma, Chenyan Zheng, Zihan Wang, Fang Wu,**

**Bing Fang \***

Key Laboratory of Precision Nutrition and Food Quality, Department of Nutrition and Health, China Agricultural University, Beijing, 100193, China.

\* Corresponding author. Bing Fang, PhD, Key Laboratory of Precision Nutrition and Food Quality, Department of Nutrition and Health, China Agricultural University, No. 10 Tianxiu Road, Haidian District, Beijing, 100193, China. Tel: +86-10-62736344;

Fax: +86-10-62736344. \* Email: [bingfang@cau.edu.cn](mailto:bingfang@cau.edu.cn)

Table S1. Statistics of the serum differential metabolites.

| Metabolite                                        | Average relative expression level |             |             |             | VIP      |
|---------------------------------------------------|-----------------------------------|-------------|-------------|-------------|----------|
|                                                   | 5×FAD                             | NOR-H       | DHA-L       | DHA-H       |          |
| N-Acetylserotonin                                 | 28009.20963                       | 71255.23643 | 70377.26053 | 110992.3917 | 2.2038   |
| PS(14:0/18:2)                                     | 13710.42015                       | 41601.43934 | 24188.54042 | 52064.18719 | 1.807325 |
| TG(22:6/22:6/22:6)                                | 152367.6582                       | 228252.0813 | 210375.0401 | 271446.7928 | 1.745819 |
| Prostaglandin F1a                                 | 56194.11918                       | 45643.21833 | 65572.49552 | 88584.9555  | 1.70609  |
| Neuroprotectin D1                                 | 62915.23771                       | 262749.9096 | 294870.3802 | 450280.9392 | 1.654595 |
| SM(d18:1/18:1)                                    | 106196.6455                       | 262178.1279 | 184041.9406 | 231933.1247 | 1.634263 |
| PC(14:0/P-16:0)                                   | 572481.5723                       | 836218.1658 | 750514.8693 | 832434.6431 | 1.59632  |
| PE(16:0/P-18:1)                                   | 194793.3825                       | 95736.98235 | 293904.9865 | 426870.011  | 1.588988 |
| DG(18:2/22:6)                                     | 17599.59277                       | 20939.2498  | 25622.78942 | 29988.94485 | 1.586656 |
| Gallic acid                                       | 1120563.418                       | 1036276.626 | 1128172.659 | 1020860.407 | 1.578963 |
| PC(38:5)                                          | 110584.1224                       | 1325292.107 | 2656350.429 | 1843591.982 | 1.569175 |
| DG(16:0/22:5/0:0)                                 | 68603.99382                       | 27461.28653 | 109783.7098 | 172252.2175 | 1.565237 |
| PS(18:0/18:1)                                     | 7664.530624                       | 137223.6099 | 20024.61347 | 151958.8869 | 1.547975 |
| PC(14:0/15:0)                                     | 57300.75978                       | 6277.982705 | 84179.26253 | 128462.2421 | 1.543475 |
| DG(18:0/22:5/0:0)                                 | 478568.3135                       | 795818.9001 | 673464.9044 | 756235.9392 | 1.537623 |
| PC(28:1)                                          | 204458.5932                       | 303920.4254 | 253715.1506 | 304308.8851 | 1.533238 |
| LysoPC(26:1/0:0)                                  | 106582.7527                       | 81806.03618 | 152958.3185 | 181276.0598 | 1.5167   |
| PC(20:2/22:6)                                     | 13351.69922                       | 26079.12605 | 67573.45502 | 125846.3927 | 1.504394 |
| PE(14:0/P-18:0)                                   | 530965.9658                       | 695965.3672 | 702817.0868 | 766181.509  | 1.471825 |
| 2-Phosphoglyceric acid                            | 3963648.937                       | 3625226.543 | 3857279.672 | 3688020.846 | 1.333013 |
| Orotic acid                                       | 3298789.303                       | 2722224.651 | 3089431.761 | 2952848.636 | 1.272563 |
| Oxalosuccinic acid                                | 4704601.637                       | 5464940.036 | 5064513.3   | 5248136.367 | 1.200813 |
| 3-hydroxypentadecanoyl carnitine                  | 82352.88746                       | 157833.3678 | 45342.57167 | 56497.22224 | 1.19515  |
| MG(0:0/20:2/0:0)                                  | 2744518.014                       | 1362036.262 | 1961863.481 | 1835016.285 | 1.19065  |
| 3b,12a-Dihydroxy-5a-<br>cholanoic acid            | 58924.24278                       | 11331.56808 | 32692.72604 | 34698.97803 | 1.15795  |
| LysoPC(16:1/0:0)                                  | 608498.8917                       | 452644.8803 | 685074.3282 | 951140.8437 | 1.14835  |
| L-Carnitine                                       | 399199.4494                       | 817039.1074 | 383050.5337 | 237803.2899 | 1.130625 |
| Alanyltryptophan                                  | 167085.4988                       | 48176.52106 | 123098.0191 | 223303.8162 | 1.0905   |
| Lysyltyrosine                                     | 158088.1278                       | 157918.8014 | 174383.6884 | 169253.319  | 1.090025 |
| Hexadecanedioic acid<br>mono-L-carnitine<br>ester | 307756.384                        | 240001.5996 | 232610.2899 | 246124.6948 | 1.06725  |
| Methionyl-<br>Phenylalanine                       | 56066.0452                        | 43258.76179 | 39249.70588 | 43964.18767 | 1.05405  |
| PS(18:0/20:3)                                     | 47715.64212                       | 39150.02731 | 53337.11017 | 71075.50588 | 1.02595  |
| DG(14:1/15:0/0:0)                                 | 624739.0914                       | 600546.9399 | 645891.6283 | 657419.985  | 1.014175 |
| Sphinganine                                       | 200127.0173                       | 163690.0296 | 218581.7387 | 266261.888  | 0.985543 |

|                                          |             |             |             |             |          |
|------------------------------------------|-------------|-------------|-------------|-------------|----------|
| 1beta-Hydroxycholic acid                 | 48776.3052  | 15073.08795 | 26984.12144 | 34003.6604  | 0.926748 |
| LysoPE(0:0/20:1)                         | 48041.7023  | 36781.48062 | 52663.34138 | 81801.88281 | 0.857563 |
| Vitamin D2 3-glucuronide                 | 354508.4099 | 375179.7433 | 379299.1328 | 412665.6568 | 0.856438 |
| Docosa-4,7,10,13,16-pentaenoyl carnitine | 563260.8898 | 456434.1745 | 444350.5434 | 479601.1713 | 0.835668 |
| Homo-L-arginine                          | 188953.4642 | 117533.2923 | 142843.1807 | 87376.80177 | 0.82518  |
| LysoPC(20:2/0:0)                         | 1620358.2   | 793416.9174 | 1697881.645 | 2015025.334 | 0.808978 |

---

Table S2. Statistics of the fecal differential metabolites.

| Metabolite              | Average relative expression level |                 |                 |                 | VIP            |
|-------------------------|-----------------------------------|-----------------|-----------------|-----------------|----------------|
|                         | 5×FAD                             | NOR-H           | DHA-L           | DHA-H           |                |
| DG(18:2/22:6/0:0)       | 42936.9075<br>3                   | 251229.220<br>8 | 209989.414<br>6 | 814339.049<br>9 | 2.3261         |
| TG(8:0/8:0/8:0)         | 1288388.26<br>1                   | 1114270.37<br>9 | 1140489.64<br>7 | 1129015.88<br>8 | 2.1525         |
| PS(14:0/14:1)           | 71112.523                         | 29344.8353<br>6 | 23164.9832<br>8 | 23997.9970<br>9 | 2.05305        |
| PC(O-30:0)              | 41140.7755<br>8                   | 1263044.37<br>4 | 145341.120<br>9 | 243988.801<br>3 | 1.922975       |
| DG(14:0/18:1)           | 396513.847<br>7                   | 340111.224<br>7 | 323324.890<br>4 | 328255.107<br>7 | 1.900025       |
| PE(15:0/P-16:0)         | 183578.031<br>8                   | 167817.122<br>7 | 170390.591<br>5 | 180412.044<br>3 | 1.8146875      |
| PC(20:0/22:6)           | 36277.8646<br>6                   | 59665.5729<br>4 | 79980.1285<br>4 | 134464.761<br>1 | 1.5376232<br>3 |
| PE(20:0/P-18:1)         | 95450.2597<br>3                   | 128778.208<br>2 | 97649.4303      | 109803.703<br>6 | 1.4812625      |
| Prolyl-Tryptophan       | 584062.811                        | 505822.712<br>1 | 536915.445<br>4 | 583721.568<br>3 | 1.39775        |
| PC(38:3)                | 79859.8872<br>3                   | 46886.4367<br>3 | 58786.4154<br>4 | 45257.8971<br>4 | 1.377725       |
| LysoPE(P-16:0/0:0)      | 145516.014<br>2                   | 33739.7544<br>2 | 246121.083      | 106764.532<br>2 | 1.3720637<br>5 |
| Cysteinyl-Serine        | 613873.354                        | 304635.398<br>8 | 425689.461<br>3 | 300101.695<br>8 | 1.3662125      |
| 12-Ketodeoxycholic acid | 65100.9555<br>2                   | 60091.0404<br>1 | 110031.645<br>4 | 65638.5119<br>5 | 1.3493337<br>5 |
| Lysyltyrosine           | 326026.425<br>4                   | 159048.210<br>4 | 244094.315<br>1 | 244796.331<br>3 | 1.346575       |
| Neuroprotectin D1       | 20645.6014<br>5                   | 26816.0712<br>9 | 28610.8778<br>9 | 37950.4808<br>9 | 1.2563375      |
| LysoPC(24:0/0:0)        | 83799.2868<br>2                   | 124528.351<br>2 | 150296.717<br>7 | 196726.565      | 1.252875       |
| PC(32:0)                | 127597.465<br>7                   | 103232.890<br>6 | 111924.583<br>7 | 123557.563      | 1.2257         |
| Methionine              | 30592.0482<br>3                   | 5685.01385<br>1 | 25274.3322<br>9 | 31355.8253<br>9 | 1.2037875      |
| Lysylserine             | 302047.437<br>6                   | 1103285.94<br>5 | 737394.739<br>2 | 321148.172<br>5 | 1.1880625      |
| Inosine                 | 105156.629<br>7                   | 53046.2571<br>9 | 31927.6414<br>1 | 38350.6918<br>1 | 1.1870875      |
| Glutamic acid           | 32482.1225                        | 31398.3768      | 35926.074       | 33501.9019      | 1.099625       |

|                                    |            |            |            |            |           |
|------------------------------------|------------|------------|------------|------------|-----------|
|                                    |            | 9          |            | 8          |           |
| LysoPC(14:0/0:0)                   | 474965.498 | 478431.887 | 484395.618 | 504655.086 | 1.0473525 |
|                                    | 7          | 8          | 8          | 8          |           |
| LysoPC(22:4/0:0)                   | 185194.486 | 89690.8786 | 204169.124 | 211483.081 | 1.0399137 |
|                                    | 5          | 6          | 3          | 5          |           |
| 3b,12a-Dihydroxy-5a-cholanoic acid | 74182985.9 | 46977683.5 | 69027957.0 | 67344952.8 | 1.0336    |
|                                    | 8          | 6          | 2          | 2          |           |
| 7b-Hydroxy-3-oxo-5b-cholanoic acid | 241328.153 | 154730.800 | 202208.370 | 126047.006 | 1.0186337 |
|                                    | 7          | 1          | 6          | 1          | 5         |
| 3-hydroxyundecanoyl carnitine      | 923509.554 | 471503.677 | 957227.157 | 1081510.25 | 1.0076512 |
|                                    | 9          | 4          | 3          | 6          | 5         |
| MG(0:0/18:3/0:0)                   | 198430.073 | 63853.6846 | 55781.2651 | 89397.9427 | 0.9989225 |
|                                    | 9          | 4          | 2          | 8          |           |
| 5-Hydroxytryptophol                | 188893.932 | 132777.107 | 197722.914 | 201346.972 | 0.9622087 |
|                                    | 8          | 3          | 7          | 4          | 5         |
| Deoxyinosine                       | 94609.4814 | 233932.797 | 134418.584 | 64988.6896 | 0.947265  |
|                                    | 7          | 8          | 8          | 7          |           |
| PG(16:0/16:0)                      | 93265.3252 | 54115.1298 | 87392.4461 | 90767.5341 | 0.9406112 |
|                                    | 4          | 9          | 7          | 5          |           |
| DG(15:0/22:5/0:0)                  | 460953.059 | 463545.911 | 476339.023 | 483230.619 | 0.9374625 |
|                                    | 8          | 4          | 4          | 8          |           |
| LysoPC(20:5/0:0)                   | 29823.1016 | 17797.6963 | 27802.1906 | 20226.6456 | 0.8853462 |
|                                    | 6          | 9          | 8          | 8          | 5         |
| PC(15:0/18:1)                      | 550853.027 | 426747.786 | 515105.708 | 469834.098 | 0.8534137 |
|                                    |            | 9          | 9          | 3          | 5         |
| 16-Hydroxyhexadecanoic acid        | 196690.070 | 105429.920 | 44344.8597 | 56155.6902 | 0.8372137 |
|                                    | 2          | 3          | 5          | 9          | 5         |
| Glycocholic acid                   | 182873.786 | 188629.986 | 183553.381 | 177297.917 | 0.803245  |
|                                    | 9          | 7          | 2          | 1          |           |
| Isoleucyl-Lysine                   | 726330.693 | 550326.939 | 336573.210 | 422560.622 | 0.7766875 |
|                                    | 8          | 6          | 4          | 2          |           |
| 7-Ketodeoxycholic acid             | 224383.775 | 135465.238 | 147777.700 | 158408.976 | 0.76626   |
|                                    | 6          | 7          | 4          | 8          |           |
| LysoPC(20:0/0:0)                   | 234440.179 | 141015.019 | 144807.296 | 179189.123 | 0.7273687 |
|                                    | 5          | 2          | 7          | 4          | 5         |
| 4,8-Dimethylnonanoyl carnitine     | 460652.697 | 426870.245 | 173710.477 | 154909.655 | 0.7107162 |
|                                    | 4          | 6          | 2          | 5          |           |
| CerP(d18:1/18:0)                   | 112932.011 | 92813.2195 | 46792.0475 | 42217.0641 | 0.6421437 |
|                                    | 1          | 1          | 9          | 7          | 5         |
